1 Paninvasion severity assessment of a US grape pest to disrupt the global wine market

2

3 **Nicholas A. Huron\***

4 **Jocelyn E. Behm**

5 **Matthew R. Helmus**

6

7 Integrative Ecology Lab, Center for Biodiversity, Department of Biology, Temple University,

8 Philadelphia, PA 19122 USA.

9

10 \* corresponding author, [nahuron@temple.edu](mailto:nahuron@temple.edu)

11

12 **Abstract**

13 Economic impacts from plant pests are often felt at the regional scale, yet some impacts expand  
14 to the global scale through the alignment of a pest's invasion potentials. Such globally invasive  
15 species (i.e., paninvasives) are like the human pathogens that cause pandemics; and like  
16 pandemics, assessing paninvasion risk for an emerging regional pest is key for stakeholders to  
17 take early actions that avoid market disruption. Here, we develop the paninvasion severity  
18 assessment framework and use it to assess a rapidly spreading regional US grape pest, the  
19 spotted lanternfly planthopper (*Lycorma delicatula*; SLF), to spread and disrupt the global wine  
20 market. We found that SLF invasion potentials are aligned globally because important  
21 viticultural regions with suitable environments for SLF establishment also heavily trade with  
22 invaded US states. If the US acts as an invasive bridgehead, Italy, France, Spain, and other  
23 important wine exporters are likely to experience the next SLF introductions. Risk to the global  
24 wine market is high unless stakeholders work to reduce SLF invasion potentials in the US and  
25 globally.

26

27

28 Invasive plant pests cause substantial economic impacts<sup>1</sup>, but most pests and their impacts are  
29 confined to specific regions. For a regional pest to become a globally invasive species (i.e.,  
30 paninvasive) that disrupts global markets, ecological and economic factors that determine the  
31 pest's transport, establishment, and impact potentials must be aligned at the global scale (Fig. 1,  
32 SI)<sup>2</sup>. First, paninvasive pests have high transport potential because they can be easily transported  
33 among regions, often through global trade<sup>3</sup>. Second, paninvasive pests have high establishment  
34 potential, because their environmental needs for population growth are met in many regions<sup>4</sup>.  
35 Third, paninvasive pests have high impact potential, because invaded regions have sizeable  
36 agricultural production and industries vulnerable to the pest<sup>5</sup>. If these invasion potentials are  
37 correlated across multiple regions globally for an emerging regional pest, there is a high risk of  
38 the pest spreading to cause supply crashes in regional markets that cascade to disrupt global  
39 markets<sup>6</sup>.

40 Despite the importance of identifying emerging paninvasives, there is no framework for  
41 rapidly assessing and effectively communicating such risk to stakeholders<sup>7</sup>. To address this gap,  
42 we developed the paninvasion severity assessment framework by adapting the US CDC  
43 pandemic severity assessment framework to invasion process theory (Fig. 1, 2)<sup>2,8-10</sup>. Although  
44 invasive species frameworks are increasingly adapted to understand infectious diseases like  
45 COVID-19<sup>11-14</sup>, adapting public-health frameworks to invasion science is novel and leverages an  
46 increasingly universal risk vocabulary<sup>15</sup> (Fig. 2). Under this framework, we assessed the  
47 paninvasion risk of the spotted lanternfly planthopper (Hemiptera: *Lycorma delicatula*; SLF, Fig.  
48 1). SLF was introduced to South Korea and Japan in the early 2000s and then to the U.S. (ca.  
49 2014) on goods imported from its native China<sup>16</sup>. SLF has rapidly spread from Pennsylvania to  
50 several other states, presenting increased opportunities for stepping-stone invasions to additional  
51 regions<sup>17-19</sup>. SLF greatly impacts grape production and has been presented to the public as one of  
52 the worst invasive species to establish in the US in a century<sup>20-22</sup>, but its paninvasion risk has  
53 not been assessed<sup>19,23,24</sup>.

54 SLF likely has high global transport potential because it lays inconspicuous egg masses  
55 on plants, stone, and trade infrastructure (e.g., containers, railcars, pallets), which facilitates  
56 long-distance transport when eggs are laid on exported items (Fig. 1a-c). Landscaping stone  
57 imported from China was the likely vector of the US invasion<sup>16</sup>. Following successful transport,  
58 SLF global establishment potential is likely enhanced by the cosmopolitan distribution of its

59 preferred host plant, the tree-of-heaven (*Ailanthus altissima*, TOH, Fig. 1d–f)<sup>19</sup>. The native  
60 ranges of SLF and TOH overlap in China, but for >250 years TOH has escaped cultivation into  
61 disturbed habitats and agricultural margins in temperate, subtropical, and Mediterranean regions  
62 globally (Fig. 1 map). Once established, SLF likely has high global impact potential to wine  
63 markets because grape is an equally suitable host<sup>25–27</sup>; Asian vineyard production is impacted by  
64 SLF infestations<sup>28,29</sup>; and SLF-invaded US vineyards have reported vine deaths, >90% yield  
65 losses, and closure<sup>19,30</sup> (Fig. 1g–i).

66 To assess paninvasion risk, we calculated invasion potentials from estimates of SLF  
67 transport, establishment, and impact potentials from the US invaded region to uninvasion US  
68 states and countries using trade, species distribution models, and grape and wine production data.  
69 We then mapped invasion potentials, calculated alignment correlations, and estimated risk to the  
70 \$300B global wine market<sup>31</sup>.

71

# Emerging Paninvasive Species Spotted Lanternfly

*Lycorma delicatula*

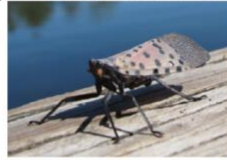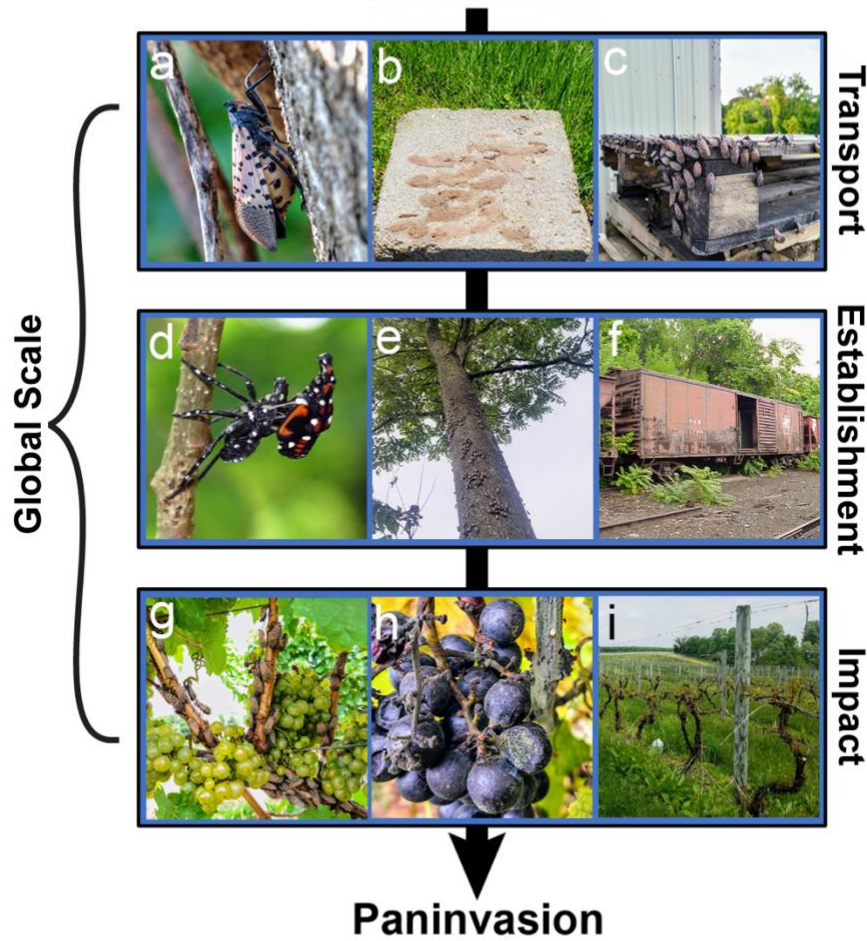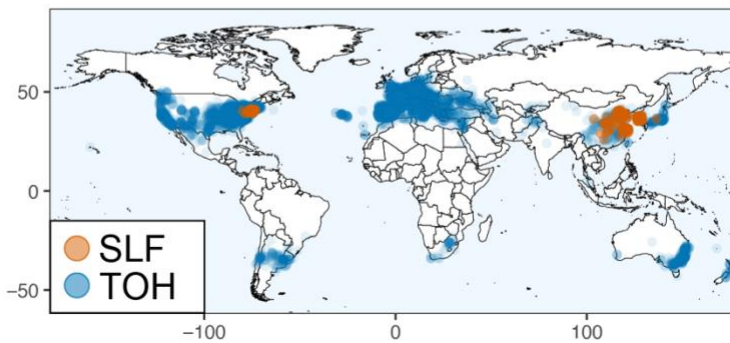

72

73 **Fig. 1** Our concept of paninvasive species is based on invasion process theory, whereby any

74 species has potentials to complete three sequential stages (depicted by the arrow) to become

75 invasive in a region (i.e., transport to the region, establishment in the region, impact to the  
76 region's economy)<sup>2</sup>. For a pest paninvasion to occur, a pest must be transported and establish in  
77 suitable regions globally where it impacts susceptible agriculture disrupting markets at a global  
78 scale (depicted by the bracket). Here, we focus on estimating invasion stage potentials for the  
79 spotted lanternfly planthopper (Hemiptera: *Lycorma delicatula*, SLF), an emerging US pest at  
80 risk of disrupting the global wine market. Photos introduce SLF biology. Gravid females (**a**) lay  
81 eggs on many surfaces like stone (**b**) and transport infrastructure (**c**). Once eggs hatch, SLF  
82 develop by molting through three black and one red nymphal instars (**d**) before molting into  
83 winged adults (top, **a**). SLF feed on phloem of many plants but develop quickly on tree-of-  
84 heaven (*Ailanthus altissima*, TOH, **e, f**), a paninvasive tree commonly found in habitat fragments  
85 around railroads (**f**) and warehouses (**c**). SLF also heavily feed on grape (**g**), reducing yield (**h**)  
86 and contributing to vine death (**i**). Photo credits: S. Cannon (**e**), M. Helmus (top, **a, d**), H. Leach  
87 (**c, g-i**), J. Losiewicz (**b**), G. Parra (**f**). The map is of SLF (orange) and TOH (blue) presences (ca.  
88 2020) we used to estimate paninvasion risk (see Methods).  
89

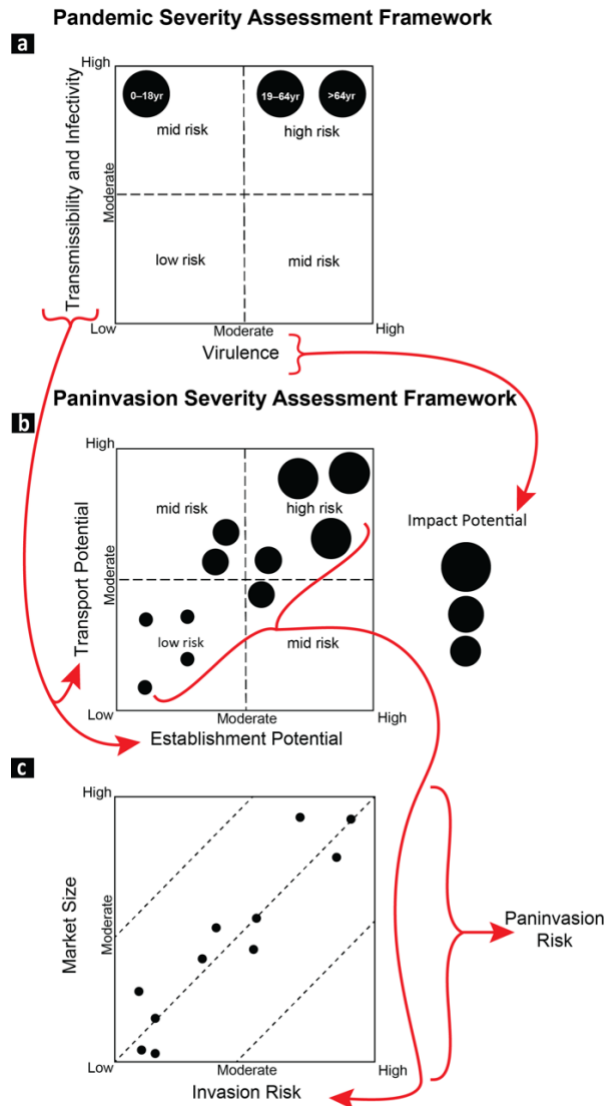

90

91 **Fig. 2.** The paninvasion severity assessment framework is adapted from the US CDC pandemic  
92 severity assessment framework used to estimate the risk of emerging human pathogens. For  
93 pandemics (a), quadrant plots of pathogen transmissibility and infectivity (combined on one  
94 axis) vs. pathogen virulence (clinical severity) are used to compare the risk of a pathogen across  
95 different populations or age groups<sup>8,9,11</sup>. For paninvasions (b), we first constructed quadrant plots  
96 that depict the alignment (i.e., multivariate correlation, see Methods) of invasion potentials for an  
97 emerging regional invasive species by equating pathogen transmission with transport potential,  
98 infectivity with establishment potential, and virulence with impact potential (follow the arrows)  
99 across regions (black circles). Next, paninvasion risk is estimated from the correlation between  
100 regional invasion risk estimated from the multivariate regression of invasion potentials (see  
101 Methods) and the size of regional markets that could be disrupted (c).

102

## 103 Results

104 To assess SLF paninvasion risk, we first estimated the current US invaded range (ca.  
105 2020). We aggregated distributional data from multiple sources, including announcements made  
106 by state departments of agriculture on cargo interceptions that did not lead to established  
107 populations (i.e., regulatory incidents). By 2020, SLF had established in nine US states, with  
108 clear incidents of long-distance transport and establishment in Virginia, New York, and  
109 Pennsylvania. In eight additional states, individuals were intercepted in cargo and on transported  
110 goods originating from states with established SLF. California had intercepted the most with >40  
111 individual SLF on 35 flights found during cargo inspections, but all were dead or moribund and  
112 not egg masses<sup>32</sup>. No international reports of regulatory incidents from the US have been  
113 published. These regulatory incidents suggest that cargo with SLF were frequently transported  
114 from the invaded range in the US northeast to at least as far as to the US west coast (Fig. 3).

115

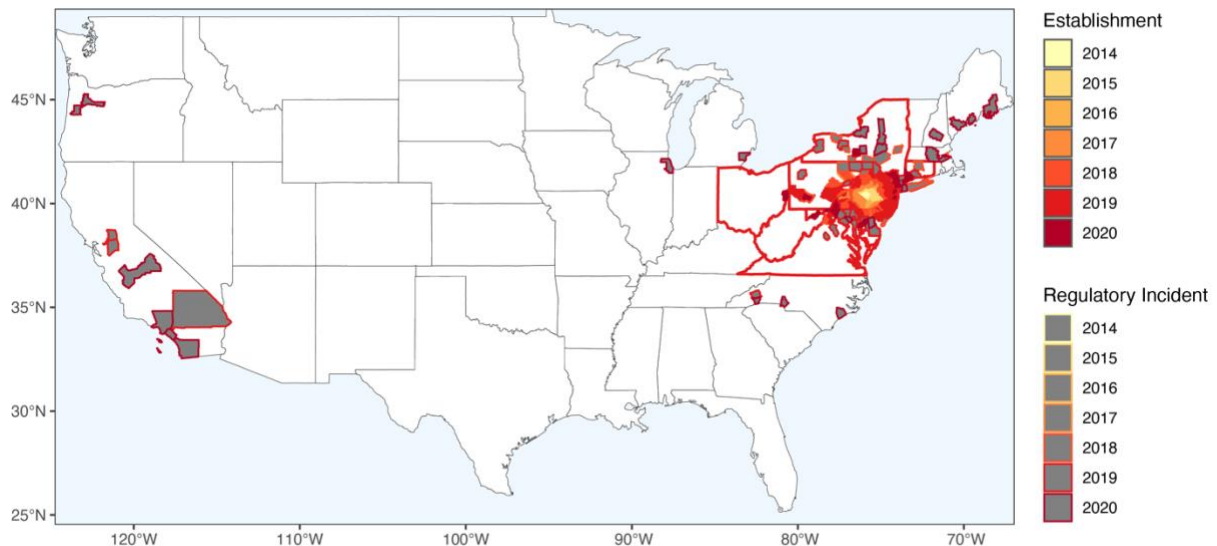

116

117 **Fig. 3** Spotted lanternfly (*Lycorma delicatula*, SLF) had invaded nine states in the US by 2020.  
118 Colored polygons are counties with established SLF populations. Grey-filled polygons are  
119 counties where SLF have been transported but have not established. These regulatory incidents  
120 include any egg cases, living, moribund, and dead individuals found in cargo. Red outlined states  
121 have established SLF populations.

122



123 We estimated the three invasion potentials—transport, establishment, impact—for 50 US  
124 states and 223 countries. For transport potential, we used the total metric tonnage of goods  
125 imported from invaded states<sup>33,34</sup>. States with the highest transport potential were mostly in the  
126 eastern US, but Illinois, Texas, and California also heavily traded with the invaded states,  
127 indicating that SLF had high potential to be transported both regionally and transcontinentally  
128 (Fig. 4a, 5a). Globally, transport potentials were highest in several European countries, Canada,  
129 and Brazil (Fig. 4b, 5b).

130 We based establishment potential on an ensemble estimate of species distribution models  
131 (SDMs) built on SLF and TOH geolocations (see SI for SDM methods, Fig. 4)<sup>35</sup>. Our ensemble  
132 estimate was similar to other SLF SDMs, but indicated urban landscapes as likely establishment  
133 locations and showed fine spatial-scale variation in establishment potential (see our interactive  
134 map <https://ieco.users.earthengine.app/view/ieco-slf-riskmap>)<sup>36,37</sup>. For each state and country, we  
135 extracted the mean, median and max predicted suitability to estimate establishment potential (see  
136 SI). Most US states had high establishment potential (Fig. 4a, 5a), and all the countries with  
137 highest transport potential also had the highest establishment potential (Fig. 4b, 5b).

138 We estimated SLF impact potential as the annual average tonnage of grapes and wine  
139 produced for each US state and country<sup>38–40</sup>. States and countries with many important  
140 viticultural regions were geographically clustered (Fig. 4), suggesting that should one become  
141 invaded, neighboring high impact potential states or countries are likely to also become invaded  
142 like the spread observed in the US (Fig. 3). States with high impact potential included California,  
143 Washington, New York, Pennsylvania, and Oregon (Fig. 4a, 5a), and countries with high impact  
144 potential include Italy, France, and Spain (Fig. 4b, 5b).

145 SLF invasion potentials across states and countries were aligned. Alignment correlations  
146 among transport, establishment, and impact potentials were positive for impact potential  
147 measured as state grape production ( $\rho = 0.41$ ,  $P < 0.005$ ), state wine production ( $\rho = 0.52$ ,  
148  $P < 0.001$ ), country grape production ( $\rho = 0.67$ ,  $P < 0.001$ ), and country wine production ( $\rho = 0.63$ ,  
149  $P < 0.001$ ). This alignment of potentials is clear in the invasion-potential alignment plots (Fig. 5).  
150 Major grape producing regions fall in the upper-right quadrant of the plots where regions have  
151 both high transport and high establishment potentials.

152 We estimated the risk of SLF to impact the global wine market to be an 8 out of 10 (Fig.  
153 6). To derive this value, we regressed country grape production on country transport and

154 establishment potentials. Each predicted value from this multivariate regression can be  
155 considered an estimate of the risk of SLF to invade and impact a country's grape production. We  
156 then rescaled these predicted values from 1–10 and correlated them to wine export market size ( $\rho$   
157 = 0.66,  $P < 0.001$ ). To place SLF on a scale of paninvasion severity, we rescaled the correlation  
158 coefficient,  $\rho$ , from 1–10, so that 1 is a complete negative correlation and 10 is a complete  
159 positive correlation between predicted impact and market size. Low values on this scale indicate  
160 that the global market is buffered against a paninvasion, while high values indicate that a  
161 paninvasion is likely unless mitigation actions are taken to reduce invasion potentials.  
162

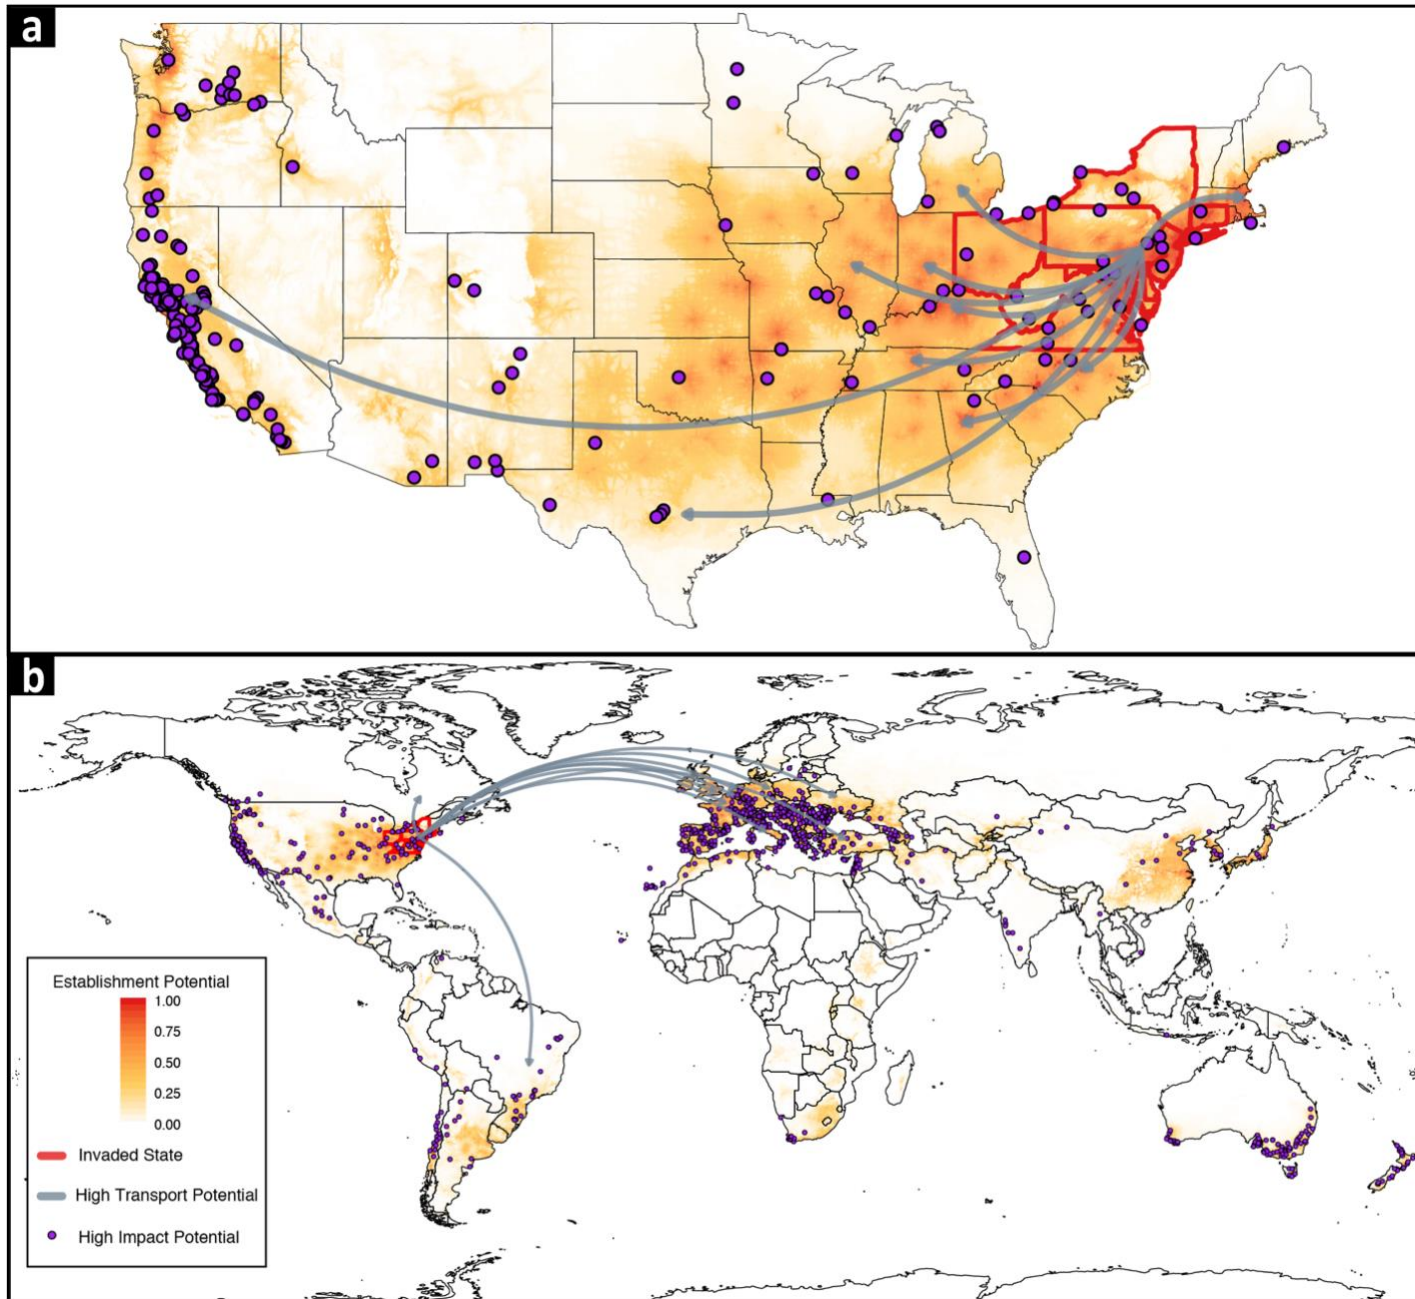

163

164 **Fig. 4** There is strong spatial alignment of spotted lanternfly (*Lycorma delicatula*, SLF)

165 transport, establishment, and impact potentials. Arrows point from the US invaded region to the

166 top ten states (a) and countries (b) with the highest transport potentials. Purple points are

167 locations of important viticultural areas.

168

169

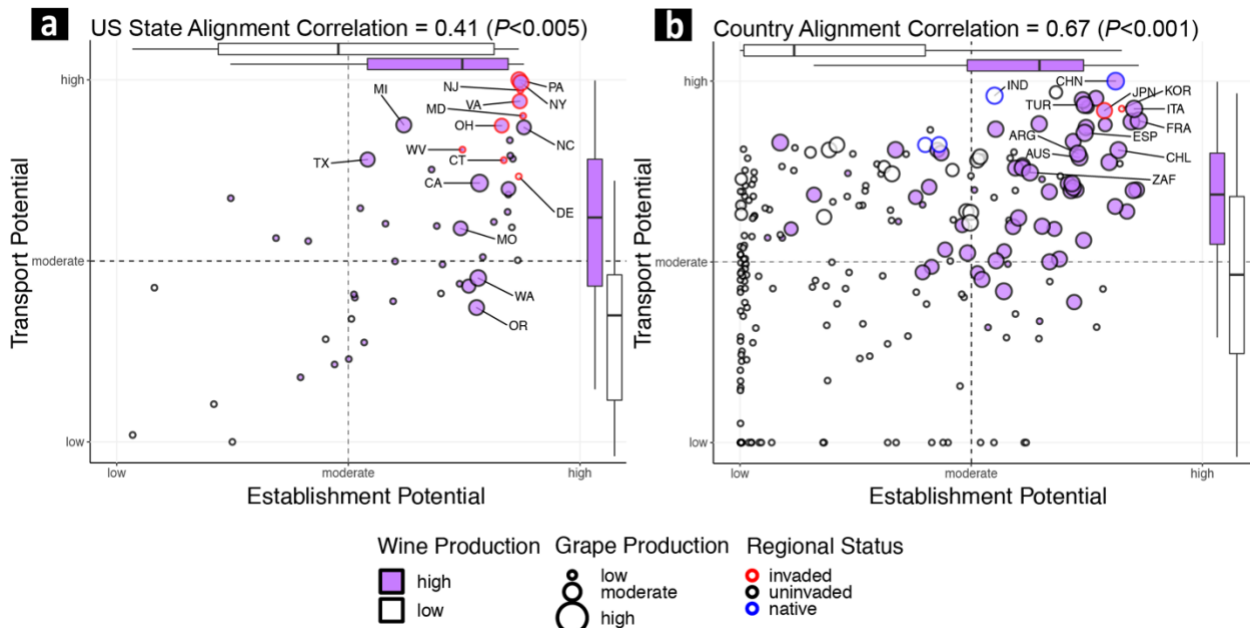

170

171 **Fig. 5** Spotted lanternfly (*Lycorma delicatula*, SLF) invasion-potential alignment plots illustrate  
172 that states (a) and countries (b) that produce most of the global supply of grapes (point size) and  
173 wine (point fill color) also have high transport and establishment potentials. Invaded regions and  
174 the top-10 grape producing regions are labeled; box plots split the distributions of establishment  
175 potential and transport potential into high (purple) and low (white) wine producing regions  
176 (center line is the median, box limits are the upper and lower quartiles, and whiskers are 1.5x the  
177 interquartile range); dashed lines divide the data into high-high, high-low, and low-low potential  
178 quadrants; and axes are scaled and formatted as suggested by the pandemic severity assessment  
179 framework<sup>8,9</sup>. Point color indicates high and low wine producing regions. Point and label size  
180 depict wine production in metric tons.

181

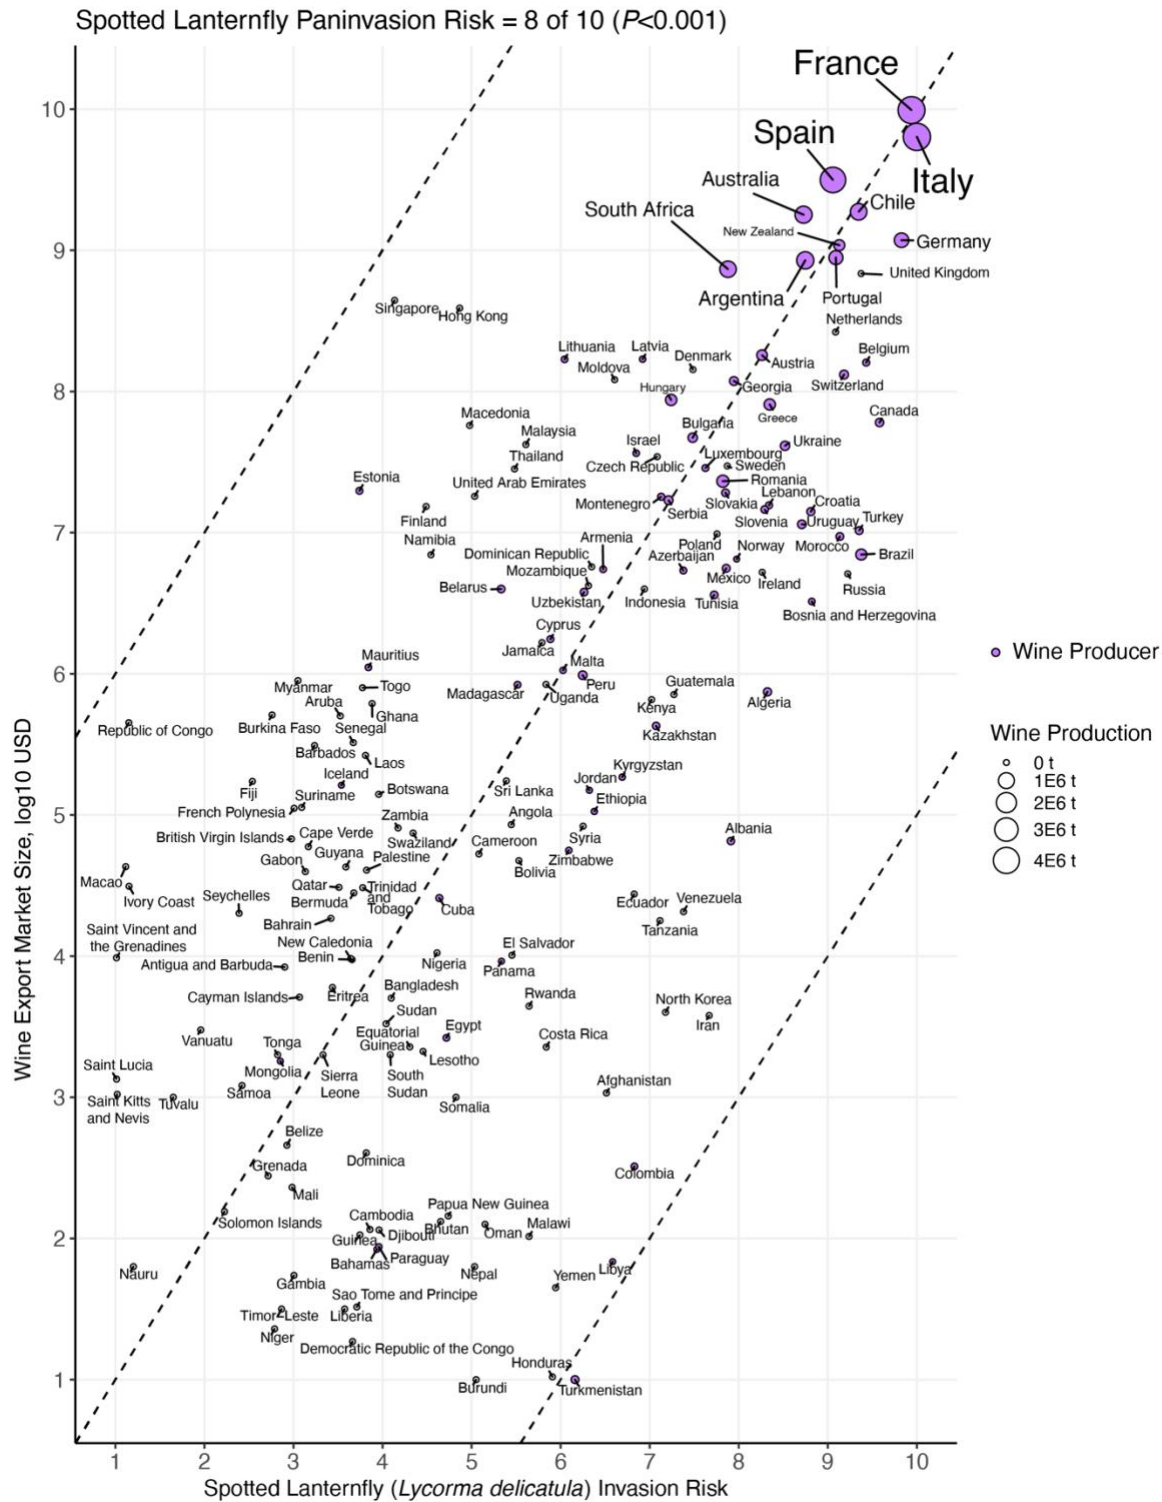

182

183 **Fig. 6** Spotted lanternfly (*Lycorma delicatula*, SLF) paninvasion risk is an 8 out of 10 due to the  
184 correlation between country wine export market size and invasion risk. Dashed lines are one-to-  
185 one guidelines at -0.5, 0, 0.5 intercepts. Point color indicates high and low wine producing  
186 regions. Point and label size depict wine production in metric tons.

187

## 188 **Discussion**

189         The risk of a SLF paninvasion is high and coordinated effort should be made to reduce its  
190 invasion potentials globally. In the US, efforts to reduce SLF transport potential are primarily  
191 through quarantine and inspection of goods, and the USDA is working towards implementing  
192 consistent, science-based, and nation-wide transport protocols<sup>19,41,42</sup>. We recommend that  
193 estimates of SLF transport potential should be updated regularly: as more states become invaded,  
194 by matching seasonal trade dynamics to SLF phenology, and by including new information on  
195 high transport potential pathways such as rail, landscaping stone, and live tree shipments<sup>16,19,28</sup>.  
196 Reduction of establishment potential focuses on removing TOH, but US agricultural agencies  
197 lack resources to remove TOH, and businesses and private citizens are increasingly burdened  
198 with TOH removal costs<sup>19</sup>. We suggest eliminating the horticultural sale of TOH; increasing  
199 funding for TOH removal; research on cost-effective TOH biocontrol methods e.g.,<sup>43</sup>; and  
200 because SLF are generalists, more research to identify other suitable hosts found in the  
201 landscapes surrounding high transport and impact potential locations like railyards and vineyards  
202 <sup>19,25,44</sup>. Finally, reduction to impact potential currently relies on reducing SLF populations with  
203 tree-band trapping and broad-spectrum insecticides (e.g., carbamates, organophosphates,  
204 pyrethroids, neonicotinoids) that have high nontarget mortality, do not prevent vineyard  
205 reinfestations, and often overlap with grape harvest when adults move into vineyards<sup>16,45,46,30,46</sup>.  
206 Damaged vines can be pruned, but grape yield is reduced<sup>46</sup>, and therefore we suggest more  
207 research on biocontrol and SLF-specific RNAi insecticides to control outbreaks in vineyards and  
208 beyond<sup>19,47-49</sup>.

209         To date, SLF has yet to invade a major viticultural area, so its impact on such regions  
210 with larger, wealthier, and interconnected wine economies is unknown. It is also unclear whether  
211 market elasticity might weaken or strengthen the disruption of a SLF paninvasion to the global  
212 wine market. When a pest like SLF with high paninvasion risk emerges, coordinated efforts can  
213 mitigate such global market disruptions. For example, the Great Wine Blight of the late 19<sup>th</sup>  
214 century caused by grapevine phylloxera (Hemiptera: *Daktulosphaira vitifoliae*) was the largest  
215 shock to the global wine market ever recorded<sup>50</sup>. Phylloxera fundamentally changed viticultural  
216 pest management, and solutions to manage it were developed through US-European  
217 collaborations coordinated by the French federal government<sup>50</sup>. However, US federal

218 coordination is hampered for SLF. In 2019, the National Invasive Species Council was defunded,  
219 and the US Invasive Species Advisory Committee, which coordinated federal invasive species  
220 control efforts since 2000, was terminated. These cuts decrease US capacity to respond to SLF  
221 and other emerging paninvasive pests and pathogens<sup>51</sup>. We suggest the committee be reinstated  
222 and council refunded so they may collaborate with the USDA and state agricultural agencies who  
223 are working to reduce SLF invasion potentials. Going forward, invasion potentials for other  
224 species are likely to increasingly align and coordinated governmental efforts will be needed to  
225 reduce invasion potentials in the US and internationally. The paninvasion severity assessment  
226 framework is a simple tool to assess such invasion potentials for any emerging invasive species  
227 and then communicate its risk to stakeholders whose involvement is necessary to mitigate any  
228 market, environmental, and human-health disruptions.

229

## 230 **Methods**

### 231 *Paninvasion Severity Assessment Framework*

232 Although the invasion process can be divided into many stages, here we focused on the  
233 three main stages most often estimated by invasion risk assessments and that are analogous to the  
234 potentials that public-health scientists quantify for pathogens (Fig. 2)<sup>e.g., 2</sup>. When a pathogen with  
235 pandemic risk emerges, public health scientists place it within scaled measures of  
236 transmissibility and infectivity (often combined and termed transmissibility), and virulence  
237 (clinical severity) to assess its risk<sup>8,9</sup>. For example, when SARS-CoV-2 emerged during the  
238 COVID-19 pandemic, the initial understanding was that different age groups had similar  
239 potentials to transmit and become infected (Fig. 2a, y-axis), but different age groups varied in  
240 their clinical severity once infected (Fig. 2a, x-axis)<sup>8,52,53</sup>. To adapt this public-health framework  
241 to invasive species, we equated transmission, infectivity, and virulence potentials of a pathogen  
242 across different human populations to the transport, establishment, and impact potentials of an  
243 invasive species across different regions (see colored arrows between Fig. 2a and b). For  
244 example, in Fig. 2b we placed several hypothetical regions that together indicate strong  
245 alignment (i.e., multivariate correlation) among invasion potentials across the regions. In this  
246 example, predicted invasion risk (Fig. 2c, x-axis) for these three hypothetical regions is strongly  
247 correlated to a measure of their contributions to a global market (Fig. 2c, y-axis), indicating an  
248 overall high paninvasion risk.

249 The paninvasion assessment of SLF comprised three steps: estimate invasion potentials,  
250 calculate alignment of invasion potentials, and quantify paninvasion risk, which we describe in  
251 detail below and in the SI methods. To make our framework accessible, we provide an open-  
252 source R package that includes all data and reproduces all results ([https://ieco-  
253 lab.github.io/slfrsk/](https://ieco-lab.github.io/slfrsk/)) and a Google Earth Engine application to map SLF paninvasion severity  
254 from global to local scales (<https://ieco.users.earthengine.app/view/ieco-slf-riskmap>). These  
255 open-science tools support assessments for other emerging regional invasives at risk of  
256 paninvasion<sup>e.g., 54</sup>. Finally, in this study we focused on a plant pest, thus agricultural and  
257 economic metrics were most relevant to assess paninvasion risk. For other invasive species,  
258 estimates of impact and disruption that include environmental or human health metrics may be a  
259 higher priority.

260

### 261 ***Step 1: Estimate Invasion Potentials***

#### 262 *Transport Potential*

263 Transport potential is a measure of propagule pressure<sup>55</sup>. The prevailing hypothesis on  
264 SLF transport potential is that regions that import more tonnage of commodities from the  
265 invaded US region also import more total tonnage of goods and trade infrastructure (e.g., cargo  
266 containers, pallets, and railcars) that inadvertently transport SLF propagules, such as egg masses,  
267 long-distances<sup>16,19,24,28,56,57</sup>. To estimate which states were invaded and identify SLF  
268 transportation events, we obtained a database of SLF records from the USDA and aggregated  
269 first-find and regulatory incident reports<sup>e.g., 32</sup>. As of December 2020, the invaded states were  
270 Connecticut, Delaware, Maryland, New Jersey, New York, Ohio, Pennsylvania, Virginia, and  
271 West Virginia (Fig. 3). We estimated transport potentials from the US invaded region as the log<sub>10</sub>  
272 of the average annual metric total tonnage of all goods imported between 2012–2017 by states  
273 and countries from the invaded US states. This date range encapsulates both pre- and post-  
274 introduction of SLF to the US and maximized temporal overlap across different data sources.  
275 Tonnage data from these invaded states were from the US Freight Analysis Framework for  
276 interstate imports<sup>33</sup> and from the US Trade Online database for international imports<sup>34</sup>, both  
277 accessed on June 14, 2019. We found that SLF spread in the US is explained by our transport  
278 potential metric (SI, Supplementary Table 1).

279



## 280 *Establishment Potential*

281 Establishment potential is the set of species-specific and environmental characteristics of  
282 a region that determine if a transported species can generate a self-sustaining population there<sup>2</sup>.  
283 We determined SLF establishment potential from an ensemble estimate from three global species  
284 distribution models (SDMs): a multivariate SDM of TOH (*sdm\_toh*), a multivariate SDM of SLF  
285 (*sdm\_slf1*), and a univariate SDM of SLF that modeled SLF presence on the predicted values  
286 from *sdm\_toh* (*sdm\_slf2*). Models were constructed using Maxent ver. 3.4.1 according to  
287 unbiased niche modeling best practices (see SI for detailed SDM methods)<sup>58–60</sup>. Specifically, our  
288 SDMs were built from unique, error checked, and spatially rarefied presence records: *sdm\_toh*  
289 on 8,578 TOH presence records, and *sdm\_slf1* and *sdm\_slf2* on 325 SLF presence records  
290 obtained from GBIF on October 20, 2020. To find the best-fit models that explained TOH and  
291 SLF presences, we identified a subset of six covariates, from 22 candidate covariates<sup>61–64</sup>, that  
292 minimized model collinearity: annual mean temperature, mean diurnal temperature range, annual  
293 precipitation, precipitation seasonality, elevation, and access to cities. We fit *sdm\_toh* and  
294 *sdm\_slf1* with these six covariates, and fit *sdm\_slf2* with the *sdm\_toh* predicted values. We  
295 evaluated model performance with *k*-fold cross-validation, specifically the receiver operating  
296 characteristic of the AUC (area under the curve) and omission error<sup>65–67</sup>.

297 Each model estimated suitability at a 30-arc-second (at the equator approximately 1 km<sup>2</sup>)  
298 global resolution with pixel values scaled 0–1, which we averaged across models per pixel to  
299 produce one ensemble image and intersected this image with state and country polygons<sup>60</sup>.  
300 Establishment potential for the 50 US states and 223 countries was estimated as the maximum  
301 pixel value for each state and country. Results and conclusions with mean and median pixel  
302 values instead of max were similar (see <https://ieco-lab.github.io/slfrsk/>).

303

## 304 *Impact Potential*

305 We used log<sub>10</sub>-transformed average annual production tonnages of grapes and wine as  
306 two separate estimates of impact potential. For consistency, we used grape and wine production  
307 during the same span of time as transport potential estimates, 2012–2017. Grape production for  
308 countries was from the Food and Agriculture Organization of the United Nations crop database<sup>38</sup>  
309 and for states from the USDA National Agricultural and Statistics Service commodity  
310 database<sup>39</sup>, both accessed on January 24, 2020. Wine production in metric tons was from

311 FAOSTAT for countries<sup>38</sup>, accessed on June 21, 2019, and from the Alcohol and Tobacco Tax  
312 and Trade Bureau (TTB) for states<sup>40</sup>, accessed on June 22, 2019, which was in gallons but we  
313 converted it to metric tons assuming 3.776e-3 t/gallon<sup>68</sup>. Major viticultural regions (Fig. 4) were  
314 aggregated and georeferenced from a TTB US state data set<sup>69</sup> and the global viticultural regions  
315 Wikipedia list<sup>70</sup> to better visualize impact within states and countries, both accessed on April 22,  
316 2020.

317

### 318 ***Step 2: Calculate Alignment Correlations***

319 To better consider how all three invasion potentials may coincide for particular regions,  
320 we calculated alignment correlations for states and countries separately. Alignment was  
321 calculated for each of the two measures of impact potential as Spearman rank correlations  
322 between impact potential and the predicted values from linear regressions models of each impact  
323 potential regressed on transport and establishment potentials together<sup>71</sup>. We then visualized these  
324 multiple multivariate, correlations as quadrant plots following a stakeholder-friendly and  
325 approachable format adapted from the pandemic severity assessment framework<sup>8,9</sup>.

326

### 327 ***Step 3: Quantify Paninvasion Risk***

328 To determine if invasion risk for countries corresponds with economic impact to the  
329 global wine industry, we investigated the relationship between wine market size and predicted  
330 risk of invasion for individual countries. We estimated wine market size for 223 countries as the  
331 value of wine exports corresponding with the years for our trade data (2012–2017, log<sub>10</sub> USD)  
332 downloaded from the FAOSTAT detailed trade matrix<sup>38</sup>, accessed August 31, 2020. Then, we  
333 regressed country grape production on transport and establishment potentials. Each predicted  
334 value from this regression can be considered an estimate of the risk of SLF to invade and impact  
335 a country's grape production. We rescaled these estimates from 1–10 to create an easily  
336 interpreted estimate of risk and then correlated these predicted values to wine export market size.  
337 To place overall SLF paninvasion severity on a clear scale for both researchers and stakeholders,  
338 we simply rescaled the Pearson correlation from 1–10, so that 1 is a complete negative  
339 correlation and 10 is a complete positive correlation between country risk and wine export  
340 market size.

341

342 *Caveats*

343 We note two caveats to our approach of quantifying paninvasion severity for SLF. First,  
344 our assessment only estimates paninvasion severity of SLF via a stepping-stone introduction  
345 from the eastern US. Because major wine producing nations also heavily trade with China where  
346 SLF is native and Japan and South Korea where SLF is established, SLF transport potential is  
347 greater than our estimates, meaning that paninvasion severity is also likely higher than what we  
348 report here, and future work should account for global trade network dynamics. Second, our  
349 approach relativizes invasion potentials with the assumption that regions with high relative  
350 potentials have high absolute potentials. However, this assumption is well met for SLF based on  
351 its apparent broad environmental suitability, flexible life cycle (e.g., egg development with or  
352 without diapause-termination via chilling)<sup>72,23,73</sup>, and ability to lay many discrete egg masses on  
353 numerous substrates (Fig. 1b), as well as rapid spread (Fig. 3) and realized impacts to grape and  
354 wine production in the invaded region of the US<sup>19,30</sup>. When a pathogen with pandemic potential  
355 emerges, the pandemic severity assessment framework compares the severity of the potentials of  
356 the current outbreak pathogen to past pandemic producing pathogens<sup>8,9,52</sup>. Thus, the next step  
357 towards a mature paninvasion framework is to estimate invasion potentials for current  
358 paninvasive species, so that the likelihood of a paninvasion for any emerging regional pest can  
359 be placed on an absolute scale of severity.

360

361 **References**

- 362 1. Ristaino, J. B. *et al.* The persistent threat of emerging plant disease pandemics to global food  
363 security. *Proc. Natl. Acad. Sci.* **118**, (2021).
- 364 2. Blackburn, T. M. *et al.* A proposed unified framework for biological invasions. *Trends Ecol.*  
365 *Evol.* **26**, 333–339 (2011).
- 366 3. Chapman, D., Purse, B. V., Roy, H. E. & Bullock, J. M. Global trade networks determine the  
367 distribution of invasive non-native species. *Glob. Ecol. Biogeogr.* **26**, 907–917 (2017).
- 368 4. Liebhold, A. M. *et al.* Plant diversity drives global patterns of insect invasions. *Sci. Rep.* **8**,  
369 1–5 (2018).

- 370 5. Bradshaw, C. J. A. *et al.* Massive yet grossly underestimated global costs of invasive insects.  
371 *Nat. Commun.* **7**, 1–8 (2016).
- 372 6. Wyckhuys, K. A. G. *et al.* Biological control of an invasive pest eases pressures on global  
373 commodity markets. *Environ. Res. Lett.* **13**, 094005 (2018).
- 374 7. Leung, B., Finnoff, D., Shogren, J. F. & Lodge, D. Managing invasive species: Rules of  
375 thumb for rapid assessment. *Ecol. Econ.* **55**, 24–36 (2005).
- 376 8. Reed, C. *et al.* Novel framework for assessing epidemiologic effects of influenza epidemics  
377 and pandemics. *Emerg. Infect. Dis.* **19**, 85 (2013).
- 378 9. Qualls, N. *et al.* Community mitigation guidelines to prevent pandemic influenza—United  
379 States, 2017. *MMWR Recomm. Rep.* **66**, 1 (2017).
- 380 10. Grarock, K., Lindenmayer, D. B., Wood, J. T. & Tidemann, C. R. Using invasion process  
381 theory to enhance the understanding and management of introduced species: A case study  
382 reconstructing the invasion sequence of the common myna (*Acridotheres tristis*). *J. Environ.*  
383 *Manage.* **129**, 398–409 (2013).
- 384 11. Nuñez, M. A., Pauchard, A. & Ricciardi, A. Invasion science and the global spread of SARS-  
385 CoV-2. *Trends Ecol. Evol.* **35**, 642–645 (2020).
- 386 12. Ogden, N. H. *et al.* Emerging infectious diseases and biological invasions: A call for a one  
387 health collaboration in science and management. *R. Soc. Open Sci.* **6**, 181577 (2019).
- 388 13. Hatcher, M. J., Dick, J. T. A. & Dunn, A. M. Disease emergence and invasions. *J. Ecol.* **26**,  
389 1275–1287 (2016).
- 390 14. Bright, C. Invasive species: Pathogens of globalization. *Foreign Policy* **1**, 50–64 (1999).
- 391 15. Katella, K. Our new COVID-19 vocabulary—what does it all mean? > Stories at Yale  
392 Medicine. *Yale Medicine* <https://www.yalemedicine.org/stories/covid-19-glossary/> (2020).

- 393 16. Parra, G., Moylett, H. & Bulluck, R. USDA-APHIS-PPQ-CPHST Technical working group  
394 summary report spotted lanternfly, *Lycorma delicatula* (White, 1845). (2018).
- 395 17. Floerl, O., Inglis, G. J., Dey, K. & Smith, A. The importance of transport hubs in stepping-  
396 stone invasions. *J. Appl. Ecol.* **46**, 37–45 (2009).
- 397 18. Barringer, L. E., Donovall, L. R., Spichiger, S.-E., Lynch, D. & Henry, D. The first New  
398 World record of *Lycorma delicatula* (Insecta: Hemiptera: Fulgoridae). *Entomol. News* **125**,  
399 20–23 (2015).
- 400 19. Urban, J. M. Perspective: Shedding light on spotted lanternfly impacts in the USA. *Pest*  
401 *Manag. Sci.* **76**, 10–17 (2019).
- 402 20. Roush, R. How we can contain the spotted lanternfly — maybe the worst invasive pest in  
403 generations | Opinion. <https://www.inquirer.com> (2018).
- 404 21. Imbler, S. The dreaded lanternfly, scourge of agriculture, spreads in New Jersey. *The New*  
405 *York Times* (2020).
- 406 22. Morrison, R. Invasive insects: The top 4 ‘most wanted’ list. *Entomology Today*  
407 <https://entomologytoday.org/2018/06/21/invasive-insects-the-top-4-most-wanted-list/> (2018).
- 408 23. Du, Z. *et al.* Global phylogeography and invasion history of the spotted lanternfly revealed  
409 by mitochondrial phylogenomics. *Evol. Appl.* (2021) doi:<https://doi.org/10.1111/eva.13170>.
- 410 24. Lee, D.-H., Park, Y.-L. & Leskey, T. C. A review of biology and management of *Lycorma*  
411 *delicatula* (Hemiptera: Fulgoridae), an emerging global invasive species. *J. Asia-Pac.*  
412 *Entomol.* **22**, 589–596 (2019).
- 413 25. Murman, K. *et al.* Distribution, survival, and development of spotted lanternfly on host  
414 plants found in North America. *Environ. Entomol.* **49**, 1270–1281 (2020).

- 415 26. Derstine, N. T. *et al.* Plant volatiles help mediate host plant selection and attraction of the  
416 spotted lanternfly (Hemiptera: Fulgoridae): A generalist with a preferred host. *Environ.*  
417 *Entomol.* **49**, 1049–1062 (2020).
- 418 27. Lee, J.-E. *et al.* Feeding behavior of *Lycorma delicatula* (Hemiptera: Fulgoridae) and  
419 response on feeding stimulants of some plants. *Korean J. Appl. Entomol.* **48**, 467–477  
420 (2009).
- 421 28. Park, M., Kim, K.-S. & Lee, J.-H. Genetic structure of *Lycorma delicatula* (Hemiptera:  
422 Fulgoridae) populations in Korea: Implication for invasion processes in heterogeneous  
423 landscapes. *Bull. Entomol. Res.* **103**, 414–424 (2013).
- 424 29. Dara, S. K., Barringer, L. & Arthurs, S. P. *Lycorma delicatula* (Hemiptera: Fulgoridae): A  
425 new invasive pest in the United States. *J. Integr. Pest Manag.* **6**, 1–6 (2015).
- 426 30. Leach, H. & Leach, A. Seasonal phenology and activity of spotted lanternfly (*Lycorma*  
427 *delicatula*) in Eastern U.S. vineyards. *J. Pest Sci.* **93**, 1215–1224 (2020).
- 428 31. International Organisation of Vine and Wine. *2019 Statistical Report on World*  
429 *Vitiviniculture*. 23 (2019).
- 430 32. California Department of Food and Agriculture. *Pest detection advisory no. PD17-2020*  
431 *spotted lanternfly PD/EP activity summary 2020*. 1–7 (2020).
- 432 33. Oak Ridge National Lab. Freight analysis framework version 4. <http://faf.ornl.gov/fafweb/>  
433 (2017).
- 434 34. U.S. Census Bureau. U.S.A. Trade Online. <https://usatrade.census.gov/index.php?do=login>  
435 (2019).
- 436 35. GBIF. GBIF: The global biodiversity information facility. <https://www.gbif.org/> (2019).

- 437 36. Jung, J.-M., Jung, S., Byeon, D. & Lee, W.-H. Model-based prediction of potential  
438 distribution of the invasive insect pest, spotted lanternfly *Lycorma delicatula* (Hemiptera:  
439 Fulgoridae), by using CLIMEX. *J. Asia-Pac. Biodivers.* **10**, 532–538 (2017).
- 440 37. Wakie, T. T., Neven, L. G., Yee, W. L. & Lu, Z. The establishment risk of *Lycorma*  
441 *delicatula* (Hemiptera: Fulgoridae) in the United States and globally. *J. Econ. Entomol.* **113**,  
442 306–314 (2020).
- 443 38. FAOSTAT. Food and Agriculture Organization of the United Nations. *FAOSTAT Data*  
444 <http://www.fao.org/faostat/en/#data> (2019).
- 445 39. USDA National Agricultural Statistics Service. National agricultural statistics service - quick  
446 stats. <https://quickstats.nass.usda.gov/> (2019).
- 447 40. U.S. Alcohol and Tobacco Tax and Trade Bureau. Wine statistics.  
448 <https://www.ttb.gov/wine/wine-stats.shtml> (2019).
- 449 41. Crowe, J. Spotted lanternfly control program in the Mid-Atlantic region environmental  
450 assessment. *USDA APHIS Rep.* 46 (2018).
- 451 42. US Animal and Plant Health Inspection Service. USDA provides \$7.1 million to  
452 Pennsylvania to support projects that protect agriculture and natural resources.  
453 [https://www.aphis.usda.gov/wcm/connect/APHIS\\_Content\\_Library/SA\\_Newsroom/SA\\_News/SA\\_By\\_Date/SA-2019/pennsylvania-  
454 funding?presentationtemplate=APHIS\\_Design\\_Library%2FPT\\_Print\\_Friendly\\_News\\_releas  
455 e](https://www.aphis.usda.gov/wcm/connect/APHIS_Content_Library/SA_Newsroom/SA_News/SA_By_Date/SA-2019/pennsylvania-funding?presentationtemplate=APHIS_Design_Library%2FPT_Print_Friendly_News_release) (2019).
- 457 43. Brooks, R. K., Wickert, K. L., Baudoin, A., Kasson, M. T. & Salom, S. Field-inoculated  
458 *Ailanthus altissima* stands reveal the biological control potential of *Verticillium nonalfalae*  
459 in the Mid-Atlantic region of the United States. *Biol. Control* **148**, 104298 (2020).

- 460 44. Barringer, L. & Ciafré, C. M. Worldwide feeding host plants of spotted lanternfly, with  
461 significant additions from North America. *Environ. Entomol.* **49**, 999–1011 (2020).
- 462 45. Leach, H., Biddinger, D. J., Krawczyk, G., Smyers, E. & Urban, J. M. Evaluation of  
463 insecticides for control of the spotted lanternfly, *Lycorma delicatula*, (Hemiptera:  
464 Fulgoridae), a new pest of fruit in the Northeastern U.S. *Crop Prot.* **124**, 104833 (2019).
- 465 46. Penn State Extension. Spotted lanternfly management in vineyards.  
466 <https://extension.psu.edu/spotted-lanternfly-management-in-vineyards>.
- 467 47. Whyard, S., Singh, A. D. & Wong, S. Ingested double-stranded RNAs can act as species-  
468 specific insecticides. *Insect Biochem. Mol. Biol.* **39**, 824–832 (2009).
- 469 48. Liu, H. & Mottern, J. An old remedy for a new problem? Identification of *Ooencyrtus*  
470 *kuvanae* (Hymenoptera: Encyrtidae), an egg parasitoid of *Lycorma delicatula* (Hemiptera:  
471 Fulgoridae) in North America. *J. Insect Sci.* **17**, 1–6 (2017).
- 472 49. Yang, Z.-Q., Choi, W.-Y., Cao, L.-M., Wang, X.-Y. & Hou, Z.-R. A new species of  
473 *Anastatus* (Hymenoptera: Eulpeimidae) from China, parasitizing eggs of *Lycorma delicatula*  
474 (Homoptera: Fulgoridae). *Zool. Syst.* **40**, 290–302 (2015).
- 475 50. Ordish, G. *The great wine blight*. (Charles Scribner's Sons, 1972).
- 476 51. Simberloff, D. *et al.* U.S. action lowers barriers to invasive species. *Science* **367**, 636–636  
477 (2020).
- 478 52. Freitas, A. R. R. *et al.* Assessing the severity of COVID-19. *Epidemiol. E Serviços Saúde* **29**,  
479 1–5 (2020).
- 480 53. Prevent Epidemics. *COVID-19 Key COVID-19 metrics based on the latest available science*.  
481 <https://preventepidemics.org/covid19/science/weekly-science-review/> (2020).



- 482 54. Zhu, G., Illan, J. G., Looney, C. & Crowder, D. W. Assessing the ecological niche and  
483 invasion potential of the Asian giant hornet. *Proc. Natl. Acad. Sci.* **117**, 24646–24648  
484 (2020).
- 485 55. Lockwood, J. L., Cassey, P. & Blackburn, T. The role of propagule pressure in explaining  
486 species invasions. *Trends Ecol. Evol.* **20**, 223–228 (2005).
- 487 56. Liu, H. Oviposition substrate selection, egg mass characteristics, host preference, and life  
488 history of the spotted lanternfly (Hemiptera: Fulgoridae) in North America. *Environ.*  
489 *Entomol.* **48**, 1452–1468 (2019).
- 490 57. Liu, H. Seasonal development, cumulative growing degree-days, and population density of  
491 spotted lanternfly (Hemiptera: Fulgoridae) on selected hosts and substrates. *Environ.*  
492 *Entomol.* **49**, 1171–1184 (2020).
- 493 58. Phillips Steven J., Anderson Robert P., Dudík Miroslav, Schapire Robert E., & Blair Mary E.  
494 Opening the black box: An open-source release of Maxent. *Ecography* **40**, 887–893 (2017).
- 495 59. Araújo, M. B. & New, M. Ensemble forecasting of species distributions. *Trends Ecol. Evol.*  
496 **22**, 42–47 (2007).
- 497 60. Araújo, M. B. *et al.* Standards for distribution models in biodiversity assessments. *Sci. Adv.*  
498 **5**, eaat4858 (2019).
- 499 61. Fick, S. E. & Hijmans, R. J. WorldClim 2: New 1-km spatial resolution climate surfaces for  
500 global land areas. *Int. J. Climatol.* **37**, 4302–4315 (2017).
- 501 62. Hijmans, R. J., Cameron, S. E., Parra, J. L., Jones, P. G. & Jarvis, A. Very high resolution  
502 interpolated climate surfaces for global land areas. *Int. J. Climatol.* **25**, 1965–1978 (2005).
- 503 63. Weiss, D. J. *et al.* A global map of travel time to cities to assess inequalities in accessibility  
504 in 2015. *Nature* **553**, 333–336 (2018).

- 505 64. Simard, M., Pinto, N., Fisher, J. B. & Baccini, A. Mapping forest canopy height globally  
506 with spaceborne lidar. *J. Geophys. Res. Biogeosciences* **116**, (2011).
- 507 65. Fielding, A. H. & Bell, J. F. A review of methods for the assessment of prediction errors in  
508 conservation presence/absence models. *Environ. Conserv.* **24**, 38–49 (1997).
- 509 66. Pearson, R. G., Raxworthy, C. J., Nakamura, M. & Peterson, A. T. Predicting species  
510 distributions from small numbers of occurrence records: A test case using cryptic geckos in  
511 Madagascar. *J. Biogeogr.* **34**, 102–117 (2007).
- 512 67. Anderson, R. P. & Gonzalez, I. Species-specific tuning increases robustness to sampling bias  
513 in models of species distributions: An implementation with Maxent. *Ecol. Model.* **222**, 2796–  
514 2811 (2011).
- 515 68. AVCALC. Density of alcoholic beverage, wine, table, all (food). [https://www.aqua-](https://www.aquacalc.com/page/density-table/substance/alcoholic-blank-beverage-coma-and-blank-wine-coma-and-blank-table-coma-and-blank-all)  
516 [calc.com/page/density-table/substance/alcoholic-blank-beverage-coma-and-blank-wine-](https://www.aquacalc.com/page/density-table/substance/alcoholic-blank-beverage-coma-and-blank-wine-coma-and-blank-table-coma-and-blank-all)  
517 [coma-and-blank-table-coma-and-blank-all](https://www.aquacalc.com/page/density-table/substance/alcoholic-blank-beverage-coma-and-blank-wine-coma-and-blank-table-coma-and-blank-all) (2019).
- 518 69. U.S. Alcohol and Tobacco Tax and Trade Bureau. Established AVAs.  
519 <https://www.ttb.gov/wine/established-avas> (2019).
- 520 70. Wikipedia. [https://en.wikipedia.org/wiki/List\\_of\\_wine-producing\\_regions](https://en.wikipedia.org/wiki/List_of_wine-producing_regions). (2020).
- 521 71. Allison, P. D. *Multiple regression: A primer*. (Pine Forge Press, 1999).
- 522 72. Xin, B. *et al.* Exploratory survey of spotted lanternfly (Hemiptera: Fulgoridae) and its natural  
523 enemies in China. *Environ. Entomol.* **50**, 36–45 (2020).
- 524 73. Keena, M. A. & Nielsen, A. L. Comparison of the hatch of newly laid *Lycorma delicatula*  
525 (Hemiptera: Fulgoridae) eggs from the United States after exposure to different temperatures  
526 and durations of low temperature. *Environ. Entomol.* 1–8 (2021) doi:10.1093/ee/nvaa177.  
527
