# Supplementary material for: Paninvasion severity assessment of a U.S. grape pest to disrupt the global wine market
Source: bioRxiv or medRxiv preprint supplement (doi:10.1101/2021.07.19.452723), 2022-05-11
Supplement: Supplementary file [file media-1.pdf]

1 **Supplementary Information for**

2 Paninvasion severity assessment of a US grape pest to disrupt the global wine market

3

4 Nicholas A. Huron\*

5 Jocelyn E. Behm

6 Matthew R. Helmus

7

8 Integrative Ecology Lab, Center for Biodiversity, Department of Biology, Temple University,

9 Philadelphia, PA 19122 USA.

10

11 \* corresponding author, nahuron@temple.edu

12

13 **This PDF file includes:**

14       Supplementary Methods

15       Supplementary Table 1

16       Supplementary References

17

18

19 **Supplementary Methods**

20 Below, we provide additional details for terminology and methods for the analyses  
 21 conducted in our study.

22

23 *Term Definitions*

- 24 • **alignment correlation**—multivariate relationship among invasion potentials.
- 25 • **establishment potential**—likelihood of a region to contain suitable habitat for  
 26 transported individuals of a non-native species to form a spreading population.
- 27 • **impact potential**—likelihood of a region to experience negative economic effects from  
 28 an established non-native species.
- 29 • **invasion potentials**—likelihoods of a species to move through stages in an invasion  
 30 process across regions<sup>1</sup>. We focus on the main stages: transport, establishment, impact.
- 31 • **MaxEnt**—abbreviation for maximum entropy, a presence-only SDM methodology that  
 32 uses machine-learning to estimate the probability distribution of maximum entropy based  
 33 on environmental variables and species occurrence records<sup>2,3</sup>.
- 34 • **paninvasion**—invasion of a species at the global scale that disturbs a global economic  
 35 market.
- 36 • **paninvasion risk**—the likelihood of a regional invasive species to become a globally  
 37 invasive species and cause economic repercussions.
- 38 • **paninvasive species**—globally invasive species that goes through the three main  
 39 invasion stages and thus can disturb global economic markets.
- 40 • **phylloxera**—*Daktulosphaira vitifoliae* is grapevine root pest native to North America  
 41 that was responsible for the Great Wine Blight of the late 1800's, which was the largest  
 42 economic disturbance to the global wine market ever recorded. The disruption was  
 43 mitigated by widespread planting of European vines that were grafted to North American  
 44 grapevine root stocks. The paninvasion of phylloxera continues to this day<sup>4,5</sup>.
- 45 • **species distribution model (SDM)**—spatial model used to predict the environmental  
 46 niche, habitat suitability, and establishment potential of a species.
- 47 • **spotted lanternfly (SLF)**—*Lycorma delicatula* is a planthopper native to China,  
 48 Vietnam, and India. It invaded South Korea and Japan in the early 2000's and the

49 northeastern US ca. 2014. It is known to feed on >100 different host species, including  
 50 grapes<sup>6,7</sup>.

- 51 • **transport potential**—likelihood of a region to have an introduction of a non-native  
 52 species.
- 53 • **tree of heaven (TOH)**—*Ailanthus altissima* is a paninvasive deciduous tree that is native  
 54 to China, Taiwan, and northern Korea, but has been spread globally. It is a highly  
 55 preferred host for SLF and may determine SLF establishment potential.

56

57 *Supplementary methods: Confirmation of relationship between import tonnage and SLF invasion*  
 58 *status for transport potential*

59 The prevailing hypothesis on SLF transport potential is that regions that import more  
 60 tonnage of commodities from the invaded US region also import more total tonnage of goods  
 61 and trade infrastructure (e.g., cargo containers, pallets, railcars) that inadvertently transport SLF  
 62 egg masses long-distances<sup>6,8-12</sup>. To test this hypothesis, we fit two logistic regressions with our  
 63 metric of transport potential as the covariate. This metric was the log<sub>10</sub> of the average annual  
 64 metric total tonnage imported between 2012 and 2017 from US states invaded by SLF (main text  
 65 Fig. 3). We regressed the presence/absence of established populations and regulatory incidents  
 66 (i.e., has a state experienced and reported any observations of SLF, dead, moribund, or alive,  
 67 independent of the presence of established populations?). For both establishment and regulatory  
 68 incidents, the relationship between SLF-status and our measure of transport potential was  
 69 significant, thereby providing support for our estimate of SLF transport potential (Supplemental  
 70 Table 1). These results suggest that total tonnage of imports is a suitable proxy for transport  
 71 potential until new metrics are developed that include refined pathway analyses.

72

73 *Supplementary methods: Modeling establishment potential and the influence of chilling periods*  
 74 *for diapause*

75 We estimated establishment potential as an ensemble from three global species  
 76 distribution models (SDMs): a multivariate SDM of TOH (*sdm\_toh*), a multivariate SDM of SLF  
 77 (*sdm\_slf1*), and a univariate SDM of SLF that modeled SLF presence on the predicted values  
 78 from *sdm\_toh* (*sdm\_slf2*). Models were constructed with MaxEnt ver. 3.4.1 by following best  
 79 practices for estimating unbiased niche models<sup>3,13,14</sup>. We first queried GBIF for TOH and SLF

80 presences on October 20, 2020. For TOH, 67,100 records were obtained and for SLF 3,180  
81 records were obtained<sup>15</sup>. Records were checked for errors, duplicate records removed, and the  
82 remaining records were rarefied (spatially filtered) by omitting records <10 km from each other  
83 to reduce bias from spatial autocorrelation<sup>16,17</sup>. The result was 8,578 unique, error checked TOH  
84 presence records and 325 unique, error checked SLF presence records. Thus, *sdm\_toh* was built  
85 on 8,578 TOH global presence records, and *sdm\_slf1* and *sdm\_slf2* were built on 325 SLF  
86 presence records (see our research compendium for the data, <https://github.com/ieco-lab/slfrsk>).

87 To find the best models that explained TOH and SLF presences, we started with 22  
88 potential covariates hypothesized to influence SLF and TOH global distributions. The covariates  
89 included 20 topographic and bioclimatic variables from WorldClim, which is a standard database  
90 of covariates used in global SDMs<sup>18,19</sup>. WorldClim has also been used in two previous SDMs for  
91 SLF<sup>20,21</sup>. In addition to these 20 covariates, we added Global Forest Canopy Height<sup>22</sup> because  
92 SLF feeds on multiple tree species<sup>23</sup>, and Global Access to Cities<sup>24</sup> because TOH and SLF are  
93 often established along transportation networks<sup>9</sup>. We analyzed these covariates to identify an  
94 uncorrelated subset to include in final best-fit SDMs with low model collinearity. To do this, we  
95 calculated pairwise Pearson correlations among the 22 covariates, and fit each covariate to SLF  
96 and TOH in univariate SDMs (i.e., 44 models in total). We then compared covariates that were  
97 highly correlated and retained only the covariates that fit best to the TOH and SLF presences.  
98 This reduction of potential covariates resulted six minimally correlated covariates (pairwise  
99 absolute Pearson correlations <0.70) that we fit in our models: annual mean temperature  
100 (BIO01), mean diurnal temperature range (BIO02), annual precipitation (BIO12), precipitation  
101 seasonality (BIO15), elevation (ELEV), and access to cities (ATC).

102 We fit *sdm\_toh* and *sdm\_slf1* with these six covariates; *sdm\_slf2* was fit from the  
103 *sdm\_toh* predicted values. The three models were fit under default settings of the MaxEnt  
104 program except for the following changes: (1) all features were enabled but still set to “Auto  
105 Features”, (2) response curves were created, (3) variable importance was measured via  
106 jackknifing (we did not do this for *sdm\_slf2* because it was a univariate model), (4) the threshold  
107 rule was set to “Minimum Training Presence”, and (5) the number of replicates was set to five  
108 for SLF and ten for TOH. This last modification sets the number of *k*-fold cross-validation  
109 replicates and determines the test proportion from *k*, thus we validated the three models with *k*-  
110 fold cross-validation via evaluation of the receiver operating characteristic of the AUC (area

111 under the curve) and omission error<sup>2,25-27</sup>. For AUC, the fraction of true positives relative to type  
112 I error (positive background points) is compared at all possible thresholds for each model<sup>2,25</sup>. The  
113 resultant AUCs were assessed relative to a random model where AUC = 0.50, such that values  
114 close to 1.00 indicate strong model performance and those  $\leq 0.50$  suggest poor performance<sup>25</sup>.  
115 Given presence only data, measured AUC cannot reach 1.00, but model AUCs that approach  
116 1.00 are considered to perform well<sup>2,28</sup>. Given concerns with model evaluation with AUC<sup>29-31</sup>,  
117 we also confirmed model performance with average omission error, which is the proportion of  
118 presence point(s) predicted with suitability less than the threshold averaged across replicates<sup>26,27</sup>.

119 All three models performed well according to AUC and omission error. Models yielded  
120 test AUC values  $>0.75$  while boasting average test omission error rates  $<0.01$ , indicating that  
121 each model performed better than random and identified areas of known species presence as  
122 suitable for the cross-validation partitions. *sdm\_toh* had a slightly lower AUC (0.7779) and  
123 omission error (0.0003) than *sdm\_slf1* (AUC = 0.9828, omission = 0.0064) and *sdm\_slf2* (AUC  
124 = 0.9675, omission = 0.0032). For both multivariate SDMs, we compared the variable  
125 contributions for congruence. The top four contributing variables were the same for both models  
126 (ATC, BIO01, BIO12, and BIO15 in descending order). The remaining two variables (ELEV and  
127 BIO02) contributed  $<2\%$  in each model, with ELEV contributing more in *sdm\_toh* and BIO02  
128 contributing more in *sdm\_slf1*. For *sdm\_toh*, two other variables, BIO12 and BIO15 also  
129 contributed  $<2\%$  each but still contributed more than ELEV and BIO02 (for a more detailed  
130 comparison, see our research compendium, <https://ieco-lab.github.io/slfrsk/>).

131 We averaged our three best-fit models to produce one ensemble image at the 30  
132 arcsecond resolution, and intersected this image with state and country polygons<sup>13</sup>. We then  
133 calculated summary statistics for the ensemble pixels within each state and country (mean,  
134 median, and maximum). The R function we wrote to perform this task, `extract_enm2()`, is  
135 available with the R companion package, `slfrsk` (see <https://github.com/ieco-lab/slfrsk>).  
136 Establishment potential for the 50 US states and 223 countries was estimated as the maximum  
137 pixel value for each state and country. Results and conclusions with mean and median pixel  
138 values instead of max were qualitatively similar (see <https://ieco-lab.github.io/slfrsk/>).

139 Although our work suggests widespread establishment potential, SDM-based  
140 establishment potential might overestimate suitability in warmer climates if SLF require a  
141 chilling period to initiate diapause to complete development<sup>32</sup>. However, recent work suggests

142 that while SLF can diapause as eggs in the invaded US region, native populations across China  
143 include sub-tropical regions that do not provide the colder temperatures necessary for completing  
144 diapause<sup>33</sup>, and SLF in the US do not require diapause to develop<sup>34</sup>. Indeed, under lab conditions,  
145 eggs in the US that do not undergo diapause exhibit higher survivorship than those that do  
146 undergo diapause<sup>35</sup>. This observation suggests that our global ensemble model does not  
147 overestimate SLF establishment potential and instead may be a conservative estimate, especially  
148 for warmer regions (main text Fig. 4).

149 In summary, our estimate of SLF global establishment potential was based on an  
150 ensemble of models for SLF and TOH environmental suitabilities. Two previous estimates of  
151 SLF global establishment potential have been published but did not include TOH, were not  
152 ensemble estimates, and were not built on as many presence records<sup>20,21</sup>. These other estimates  
153 also did not include an anthropogenic covariate like Global Access to Cities<sup>24</sup>, which we found to  
154 be important in determining TOH and SLF environmental suitability. Finally, although our  
155 estimate of SLF establishment potential is broadly like these previous estimates (as observed by  
156 comparing our map to theirs), it differs in three key ways: we provide our estimate in a finer  
157 resolution, our estimate differs across globally important viticultural regions, and we provide the  
158 data as open access. To visualize and download our estimate please see our Google Earth Engine  
159 app (<https://ieco.users.earthengine.app/view/ieco-slf-riskmap>).

160 **Supplementary Table 1** Logistic regression of spotted lanternfly (SLF) status on trade with  
 161 established US states as average annual metric total tonnage demonstrates a significant  
 162 relationship for all US states and Washington DC. Trade with established states predicts both  
 163 presence or absence of established SLF populations and record of SLF regulatory incidents  
 164 (identification of SLF, deceased, moribund, or alive). Logistic regression model coefficients are  
 165 shown above with standard error below in parentheses.

|                                                   | Establishment Status             | Regulatory Status               |
|---------------------------------------------------|----------------------------------|---------------------------------|
| Log <sub>10</sub> (average annual metric tonnage) | 5.64 <sup>***</sup><br>(2.03)    | 3.10 <sup>***</sup><br>(0.90)   |
| Constant                                          | -42.74 <sup>***</sup><br>(15.27) | -22.64 <sup>***</sup><br>(6.49) |
| <i>Observations</i>                               | 51                               | 51                              |
| <i>Log likelihood</i>                             | -9.80                            | -18.15                          |
| <i>Akaike information criterion</i>               | 23.61                            | 40.30                           |

Notes:

<sup>\*\*\*</sup>  $P < .01$

167 **Supplemental References**

- 168 1. Blackburn, T. M. *et al.* A proposed unified framework for biological invasions. *Trends Ecol.*  
169 *Evol.* **26**, 333–339 (2011).
- 170 2. Phillips, S. J., Anderson, R. P. & Schapire, R. E. Maximum entropy modeling of species  
171 geographic distributions. *Ecol. Model.* **190**, 231–259 (2006).
- 172 3. Phillips Steven J., Anderson Robert P., Dudík Miroslav, Schapire Robert E., & Blair Mary E.  
173 Opening the black box: An open-source release of Maxent. *Ecography* **40**, 887–893 (2017).
- 174 4. Gale, G. *Dying on the vine*. (University of California Press, 2011).
- 175 5. Ordish, G. *The great wine blight*. (Charles Scribner’s Sons, 1972).
- 176 6. Urban, J. M. Perspective: Shedding light on spotted lanternfly impacts in the USA. *Pest*  
177 *Manag. Sci.* **76**, 10–17 (2019).
- 178 7. Barringer, L. & Ciafré, C. M. Worldwide feeding host plants of spotted lanternfly, with  
179 significant additions from North America. *Environ. Entomol.* **49**, 999–1011 (2020).
- 180 8. Liu, H. Oviposition substrate selection, egg mass characteristics, host preference, and life  
181 history of the spotted lanternfly (Hemiptera: Fulgoridae) in North America. *Environ.*  
182 *Entomol.* **48**, 1452–1468 (2019).
- 183 9. Parra, G., Moylett, H. & Bulluck, R. USDA-APHIS-PPQ-CPHST Technical working group  
184 summary report spotted lanternfly, *Lycorma delicatula* (White, 1845). (2018).
- 185 10. Lee, D.-H., Park, Y.-L. & Leskey, T. C. A review of biology and management of *Lycorma*  
186 *delicatula* (Hemiptera: Fulgoridae), an emerging global invasive species. *J. Asia-Pac.*  
187 *Entomol.* **22**, 589–596 (2019).



- 188 11. Liu, H. Seasonal development, cumulative growing degree-days, and population density of  
189 spotted lanternfly (Hemiptera: Fulgoridae) on selected hosts and substrates. *Environ.*  
190 *Entomol.* **49**, 1171–1184 (2020).
- 191 12. Park, M., Kim, K.-S. & Lee, J.-H. Genetic structure of *Lycorma delicatula* (Hemiptera:  
192 Fulgoridae) populations in Korea: Implication for invasion processes in heterogeneous  
193 landscapes. *Bull. Entomol. Res.* **103**, 414–424 (2013).
- 194 13. Araújo, M. B. & New, M. Ensemble forecasting of species distributions. *Trends Ecol. Evol.*  
195 **22**, 42–47 (2007).
- 196 14. Araújo, M. B. *et al.* Standards for distribution models in biodiversity assessments. *Sci. Adv.*  
197 **5**, eaat4858 (2019).
- 198 15. GBIF. GBIF: The global biodiversity information facility. <https://www.gbif.org/> (2019).
- 199 16. Zhu, G., Illan, J. G., Looney, C. & Crowder, D. W. Assessing the ecological niche and  
200 invasion potential of the Asian giant hornet. *Proc. Natl. Acad. Sci.* **117**, 24646–24648  
201 (2020).
- 202 17. Boria, R. A., Olson, L. E., Goodman, S. M. & Anderson, R. P. Spatial filtering to reduce  
203 sampling bias can improve the performance of ecological niche models. *Ecol. Model.* **275**,  
204 73–77 (2014).
- 205 18. Fick, S. E. & Hijmans, R. J. WorldClim 2: New 1-km spatial resolution climate surfaces for  
206 global land areas. *Int. J. Climatol.* **37**, 4302–4315 (2017).
- 207 19. Hijmans, R. J., Cameron, S. E., Parra, J. L., Jones, P. G. & Jarvis, A. Very high resolution  
208 interpolated climate surfaces for global land areas. *Int. J. Climatol.* **25**, 1965–1978 (2005).

- 209 20. Jung, J.-M., Jung, S., Byeon, D. & Lee, W.-H. Model-based prediction of potential  
210 distribution of the invasive insect pest, spotted lanternfly *Lycorma delicatula* (Hemiptera:  
211 Fulgoridae), by using CLIMEX. *J. Asia-Pac. Biodivers.* **10**, 532–538 (2017).
- 212 21. Wakie, T. T., Neven, L. G., Yee, W. L. & Lu, Z. The establishment risk of *Lycorma*  
213 *delicatula* (Hemiptera: Fulgoridae) in the United States and globally. *J. Econ. Entomol.* **113**,  
214 306–314 (2020).
- 215 22. Simard, M., Pinto, N., Fisher, J. B. & Baccini, A. Mapping forest canopy height globally  
216 with spaceborne lidar. *J. Geophys. Res. Biogeosciences* **116**, (2011).
- 217 23. Barringer, L. E., Donovall, L. R., Spichiger, S.-E., Lynch, D. & Henry, D. The first New  
218 World record of *Lycorma delicatula* (Insecta: Hemiptera: Fulgoridae). *Entomol. News* **125**,  
219 20–23 (2015).
- 220 24. Weiss, D. J. *et al.* A global map of travel time to cities to assess inequalities in accessibility  
221 in 2015. *Nature* **553**, 333–336 (2018).
- 222 25. Fielding, A. H. & Bell, J. F. A review of methods for the assessment of prediction errors in  
223 conservation presence/absence models. *Environ. Conserv.* **24**, 38–49 (1997).
- 224 26. Pearson, R. G., Raxworthy, C. J., Nakamura, M. & Peterson, A. T. Predicting species  
225 distributions from small numbers of occurrence records: A test case using cryptic geckos in  
226 Madagascar. *J. Biogeogr.* **34**, 102–117 (2007).
- 227 27. Anderson, R. P. & Gonzalez, I. Species-specific tuning increases robustness to sampling bias  
228 in models of species distributions: An implementation with Maxent. *Ecol. Model.* **222**, 2796–  
229 2811 (2011).

- 230 28. Wiley, E. O., McNyset, K. M., Peterson, A. T., Robins, C. R. & Stewart, A. M. Niche  
231 modeling and geographic range predictions in the marine environment using a machine-  
232 learning algorithm. **16**, 8 (2003).
- 233 29. Peterson, A. T., Papeş, M. & Soberón, J. Rethinking receiver operating characteristic  
234 analysis applications in ecological niche modeling. *Ecol. Model.* **213**, 63–72 (2008).
- 235 30. Lobo, J. M., Jiménez-Valverde, A. & Real, R. AUC: A misleading measure of the  
236 performance of predictive distribution models. *Glob. Ecol. Biogeogr.* **17**, 145–151 (2008).
- 237 31. Jiménez-Valverde, A. Insights into the area under the receiver operating characteristic curve  
238 (AUC) as a discrimination measure in species distribution modelling. *Glob. Ecol. Biogeogr.*  
239 **21**, 498–507 (2012).
- 240 32. Shim, J.-K. & Lee, K.-Y. Molecular characterization of heat shock protein 70 cognate cDNA  
241 and its upregulation after diapause termination in *Lycorma delicatula* eggs. *J. Asia-Pac.*  
242 *Entomol.* **18**, 709–714 (2015).
- 243 33. Du, Z. *et al.* Global phylogeography and invasion history of the spotted lanternfly revealed  
244 by mitochondrial phylogenomics. *Evol. Appl.* (2021) doi:<https://doi.org/10.1111/eva.13170>.
- 245 34. Xin, B. *et al.* Exploratory survey of spotted lanternfly (Hemiptera: Fulgoridae) and its natural  
246 enemies in China. *Environ. Entomol.* **50**, 36–45 (2020).
- 247 35. Keena, M. A. & Nielsen, A. L. Comparison of the hatch of newly laid *Lycorma delicatula*  
248 (Hemiptera: Fulgoridae) eggs from the United States after exposure to different temperatures  
249 and durations of low temperature. *Environ. Entomol.* 1–8 (2021) doi:10.1093/ee/nvaa177.
- 250
